# Supplementary material for: A Chinese family affected by lynch syndrome caused by MLH1 mutation
Source: BMC Med Genet. 2018 Jun 22;19:106. doi: 10.1186/s12881-018-0605-x (PMC6014015; doi:10.1186/s12881-018-0605-x)
Supplement: Supplementary file 1 — Table S1. 101 gene panel. The gene list of targeted capture panel used in the case. (XLSX 11 kb) [file 12881_2018_605_MOESM1_ESM.xlsx]

## Sheet: Sheet1
AIP
ALK
APC
ATM
AXIN2
BAP1
BARD1
BLM
BMPR1A
BRCA1
BRCA2
BRIP1
BUB1B
CDC73
CDH1
CDK4
CDKN1B
CDKN2A
CEBPA
CHEK2
CYLD
DDB2
DICER1
DIS3L2
EGFR
EPCAM
ERCC2
ERCC3
ERCC4
ERCC5
EXT1
EXT2
FANCA
FANCB
FANCC
FANCD2
FANCE
FANCF
FANCG
FANCI
FANCL
FANCM
FH
FLCN
GATA2
GPC3
HNF1A
HRAS
KIT
MAX
MC1R
MEN1
MET
MITF
MLH1
MLH3
MRE11A
MSH2
MSH6
MUTYH
NBN
NF1
NF2
NTRK1
PALB2
PALLD
PHOX2B
PMS1
PMS2
PRKAR1A
PTCH1
PTEN
RAD50
RAD51C
RAD51D
RB1
RECQL4
RET
RHBDF2
SBDS
SDHA
SDHAF2
SDHB
SDHC
SDHD
SLX4
SMAD4
SMARCB1
STK11
SUFU
TERT
TMEM127
TP53
TSC1
TSC2
VHL
WRN
WT1
XPA
XPC
ZMAT3
